# Supplementary material for: Mechanisms underlying sequence-dependent DNA hybridisation rates in the absence of secondary structure
Source: bioRxiv or medRxiv preprint supplement (doi:10.1101/2021.12.17.473246), 2021-12-18
Supplement: Supplementary file [file media-1.pdf]

## Supplementary Information for:

### Sequence-dependent DNA hybridisation rates in the absence of secondary structure

Sophie Hertel<sup>1,^</sup>, Richard E. Spinney<sup>1,2,^</sup>, Stephanie Y. Xu<sup>1</sup>, Thomas E. Ouldrige<sup>3</sup>, Richard G. Morris<sup>1,2</sup>, and Lawrence K. Lee<sup>1,4\*</sup>

<sup>1</sup> EMBL Australia Node for Single Molecule Science, School of Medical Sciences, UNSW Sydney, 2052, Australia

<sup>2</sup> School of Physics, University of New South Wales - Sydney 2052, Australia

<sup>3</sup> Department of Bioengineering and Centre for Synthetic Biology, Imperial College London, London, SW7 2AZ, United Kingdom

<sup>4</sup> ARC Centre of Excellence in Synthetic Biology, University of New South Wales, Sydney, Australia

<sup>^</sup> These authors contributed equally

<sup>\*</sup> To whom correspondence should be addressed. Email: [lawrence.lee@unsw.edu.au](mailto:lawrence.lee@unsw.edu.au)

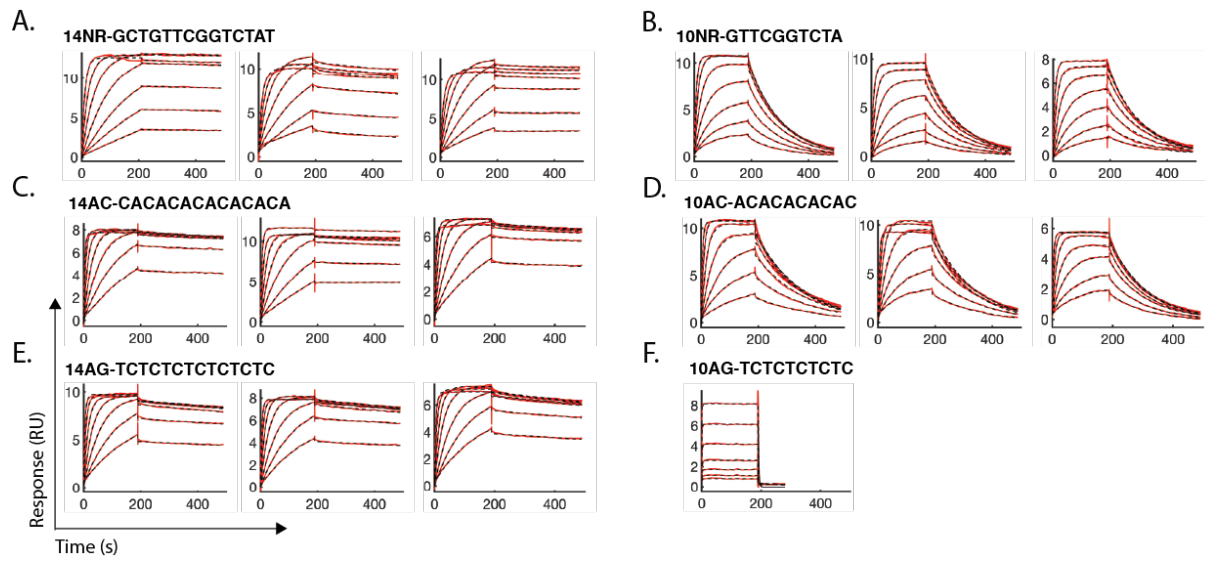

**Figure S1. Replicate SPR sensorgrams for repetitive AC and non-repetitive sequences.** Raw sensorgrams (red) with mono-exponential fits for association and dissociation (dashed black) are shown for sequences associated with Figure 1 in main text. Curves are serial dilutions from 100 nM to 1.5625 nM (A,B) 50 nM to 0.78125 nM (C-E) and 800 nM to 12.5 nM (F).

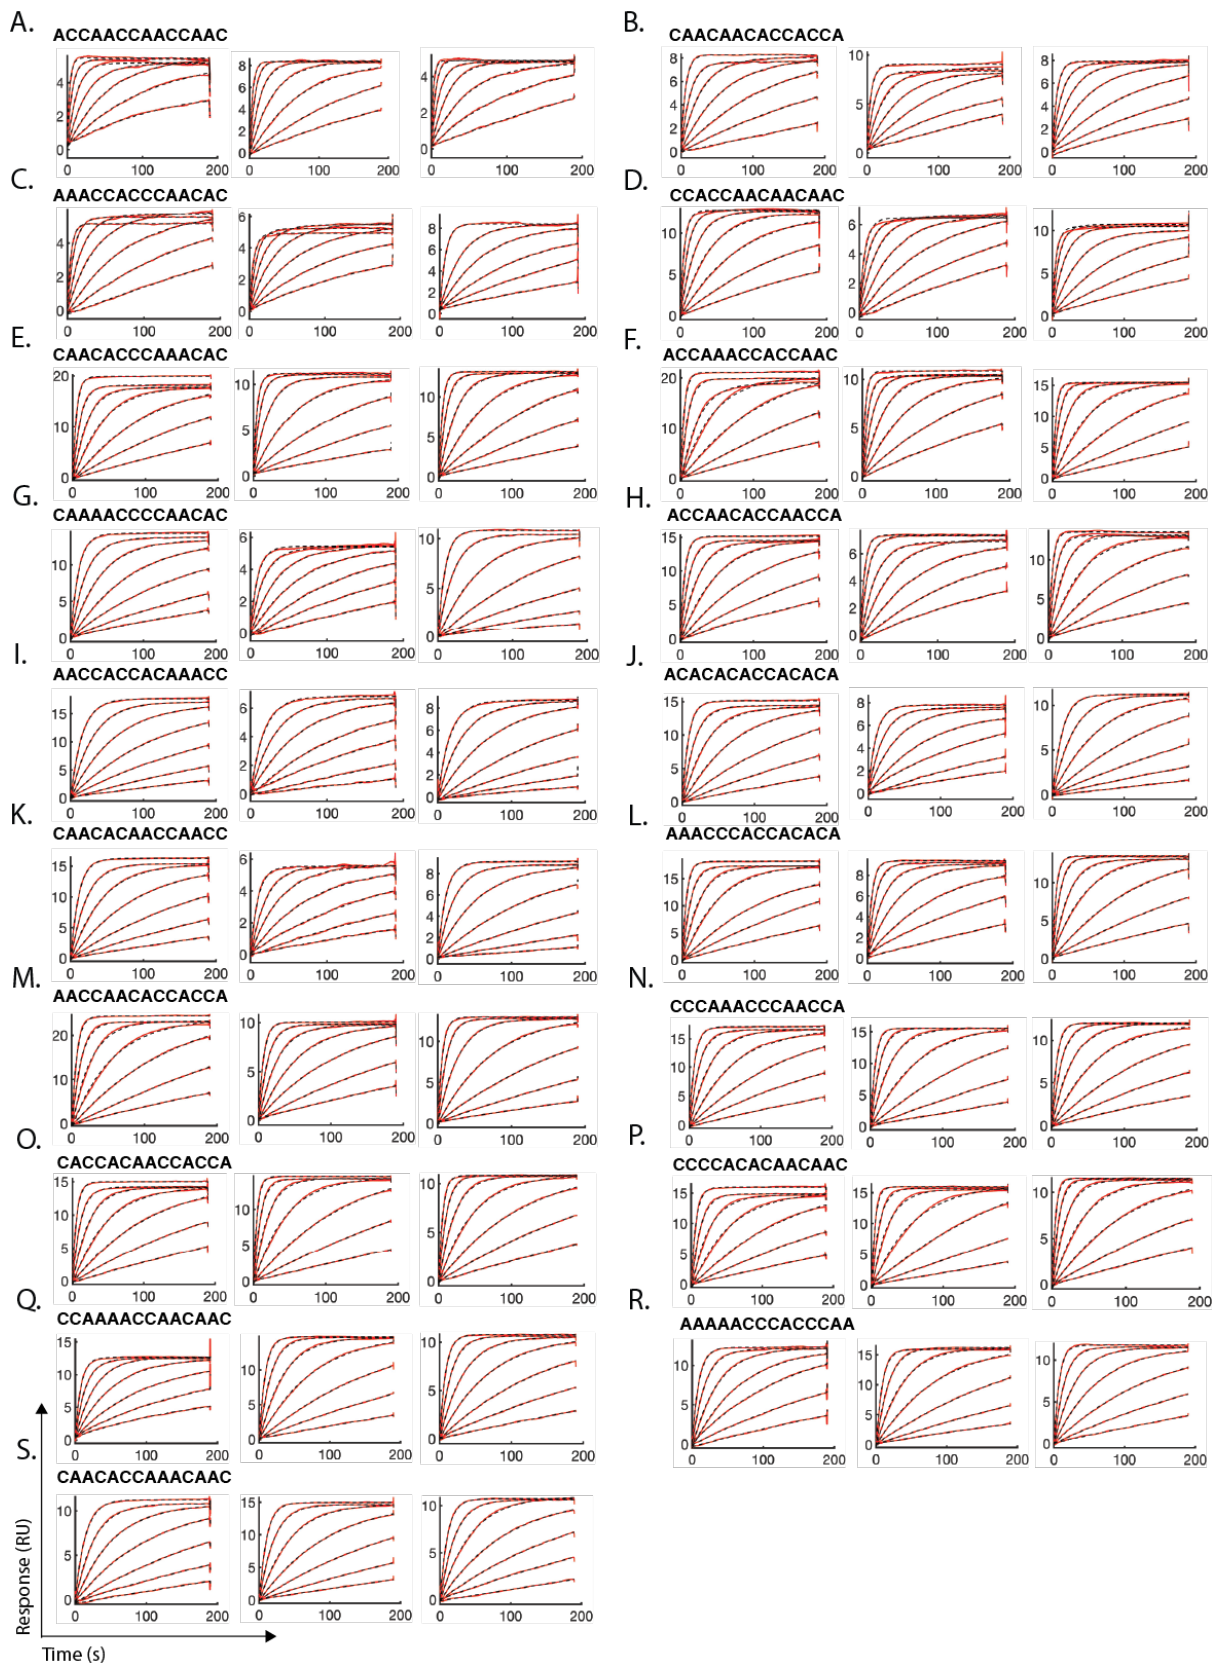

**Figure S2. Replicate SPR sensorgrams for all non-repetitive 14 base AC sequences.** Raw sensorgrams are shown in red with mono-exponential fits overlaid in dashed black). Concentrations are serial dilutions from 50 nM to 0.78125 nM.

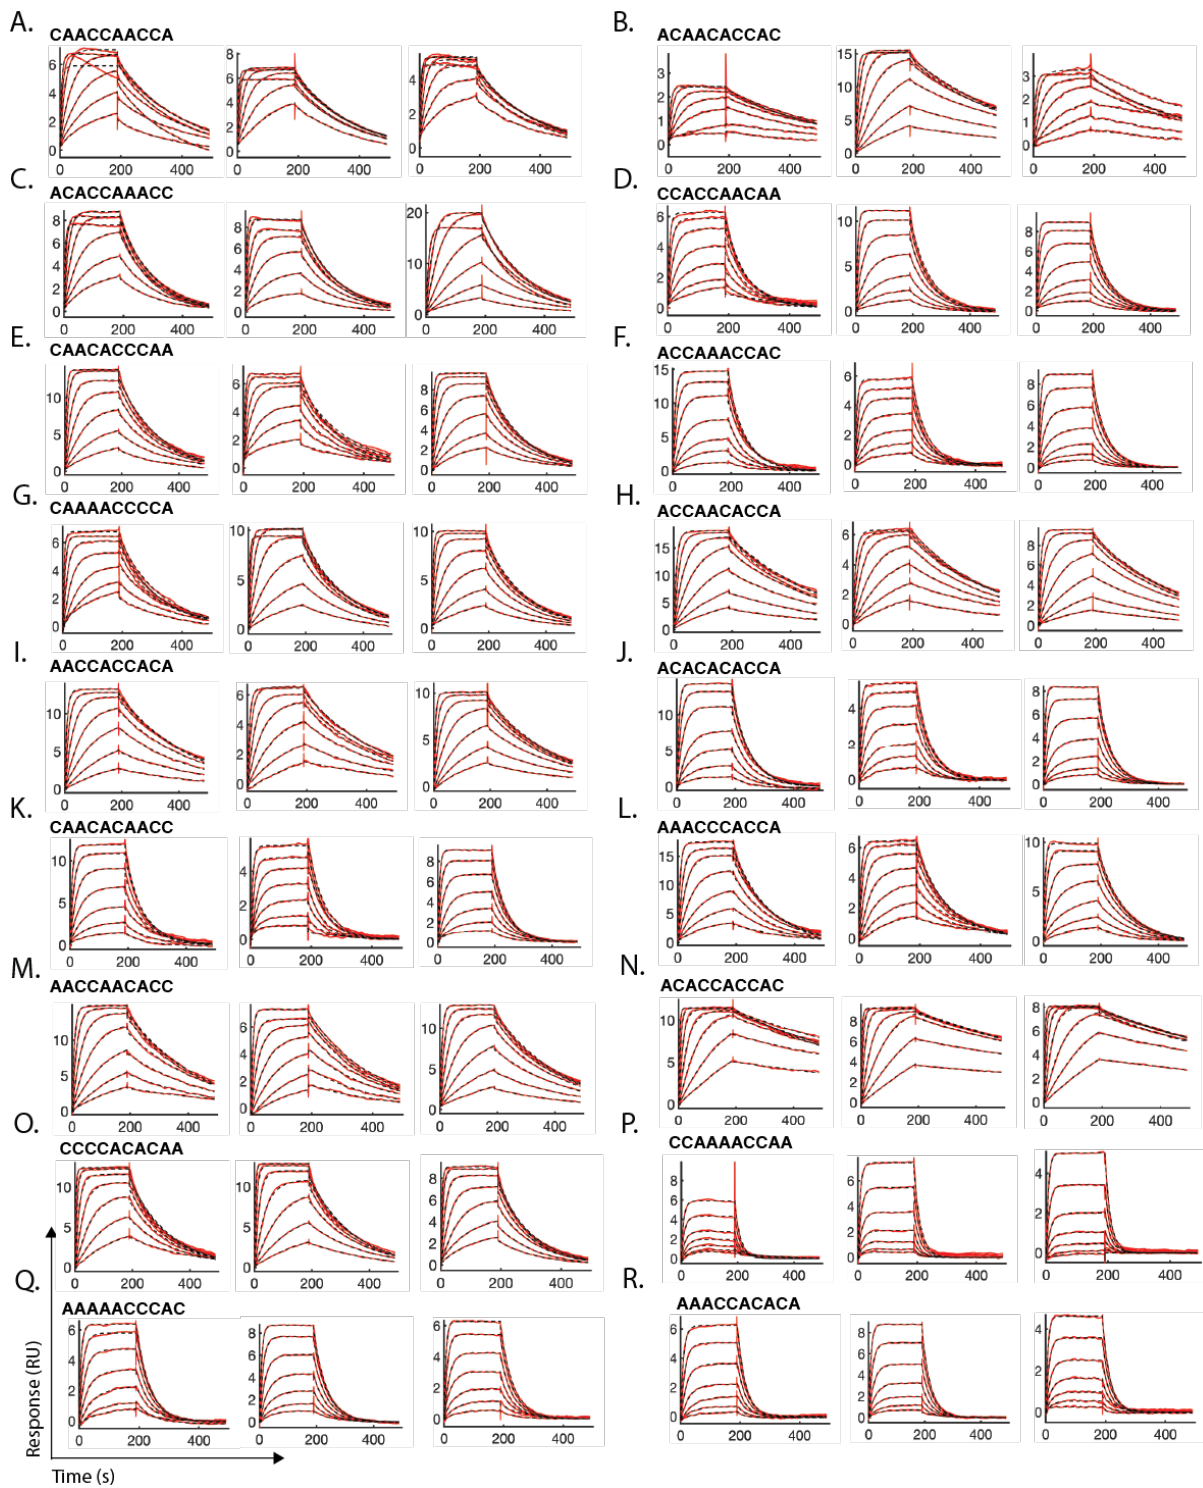

**Figure S3. Replicate SPR sensorgrams for all non-repetitive 10 base AC sequences.** Raw sensorgrams are shown in red with mono-exponential fits for association and dissociation overlaid in dashed black). Concentrations are serial dilutions from 50 nM to 0.78125 nM.

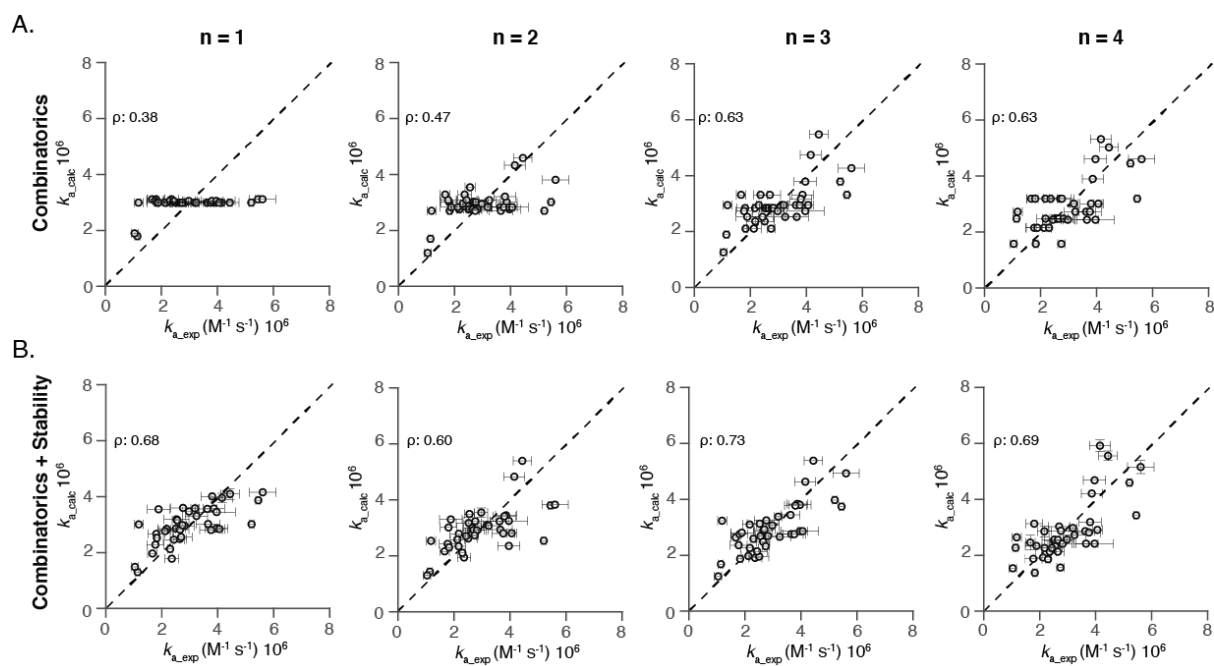

**Figure S4. Model vs experimentally measured hybridisation rates without repetitive 10AC and 14AC sequences.** (A) shows fits from combinatorics alone and (B) from the full model, which includes stability. Errors are standard deviations from at least three independent measurements.

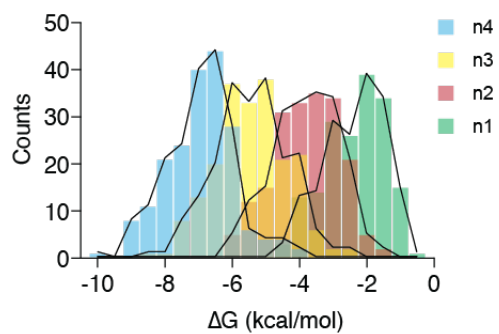

**Figure S5. Distribution of binding energies at different nucleation lengths for all unique nucleation states in this study.**

Supplementary Table 1: Comparison of equilibrium dissociation constants determined from kinetic rate constants and from steady state measurements for all 10 base DNA sequences in this study.

| Number          | Name | Sequence 5' > 3' | $K_D$ (nM) kinetics | $K_D$ (nM) steady state |
|-----------------|------|------------------|---------------------|-------------------------|
| 4               | 10NR | GTTCGGTCTA       | $7.7 \pm 0.2$       | $6.7 \pm 0.1$           |
| 5               | 10AC | ACACACACAC       | $1.6 \pm 0.1$       | $1.3 \pm 0.2$           |
| 6               | 10AG | TCTCTCTCTC       | NA                  | $212 \pm 15$            |
| 50 % GC content |      |                  |                     |                         |
| 20              |      | CAACCAACCA       | $1.4 \pm 0.1$       | $1.4 \pm 0.2$           |
| 21              |      | ACAACACCAC       | $0.9 \pm 0.02$      | $0.6 \pm 0.06$          |
| 22              |      | ACACCAAACC       | $3.7 \pm 0.3$       | $3.9 \pm 0.4$           |
| 23              |      | CCACCAACAA       | $5.1 \pm 0.9$       | $6.3 \pm 1.8$           |
| 24              |      | CAACACCCAA       | $7.0 \pm 0.4$       | $7.8 \pm 3.2$           |
| 25              |      | ACCAAACCAC       | $1.5 \pm 0.2$       | $1.4 \pm 0.4$           |
| 26              |      | CAAAACCCCA       | $6.8 \pm 0.6$       | $7.1 \pm 2.3$           |
| 27              |      | ACCAACACCA       | $3.2 \pm 0.5$       | $3.1 \pm 1.1$           |
| 28              |      | AACCACCACA       | $2.0 \pm 0.2$       | $1.9 \pm 0.3$           |
| 29              |      | ACACACACCA       | $1.7 \pm 0.1$       | $1.5 \pm 0.1$           |
| 30              |      | CAACACAACC       | $1.5 \pm 0.2$       | $1.4 \pm 0.05$          |
| 31              |      | AAACCCACCA       | $6.6 \pm 0.8$       | $5.8 \pm 0.7$           |
| 32              |      | AACCAACACC       | $1.6 \pm 0.1$       | $1.4 \pm 0.5$           |
| 57 % GC content |      |                  |                     |                         |
| 36              |      | ACACCACCAC       | $0.2 \pm 0.03$      | NA                      |
| 37              |      | CCCCACACAA       | $1.3 \pm 0.2$       | $1.4 \pm 0.4$           |
| 42 % GC content |      |                  |                     |                         |
| 41              |      | CCAAAACCAA       | $24.9 \pm 6.3$      | $28.1 \pm 5.1$          |
| 42              |      | AAAAACCCAC       | $8.9 \pm 0.6$       | $8.4 \pm 1.8$           |
| 43              |      | AAACCACACA       | $18.8 \pm 3.8$      | $16.0 \pm 4.8$          |

**Supplementary Table 2:** Statistics of the correlation coefficient,  $\rho$ , between experimental data and model predictions, for the null distribution sampled by random permutations, and resultant statistics of  $p$ -value estimates.

| Model          | n | Outliers excluded <sup>†</sup> | Data           |                | Null                             |                 | p-value                                            |                                                      |
|----------------|---|--------------------------------|----------------|----------------|----------------------------------|-----------------|----------------------------------------------------|------------------------------------------------------|
|                |   |                                | mean (std-dev) | 95% CI         | mean (std-dev)                   | 95% CI          | mean (std-dev)                                     | 95% CI                                               |
| Combinatorics  | 1 | N                              | 0.368 (0.0189) | [0.332, 0.406] | -4.71 × 10 <sup>-5</sup> (0.158) | [-0.329, 0.279] | 0.00223 (0.00169)                                  | [0.000250, 0.00654]                                  |
| Comb. + length | 1 | N                              | 0.371 (0.0187) | [0.335, 0.408] | 0.0777 (0.161)                   | [-0.262, 0.362] | 0.0218 (0.00819)                                   | [0.00920, 0.0411]                                    |
| Stability      | 1 | N                              | 0.688 (0.0254) | [0.636, 0.736] | 0.0508 (0.165)                   | [-0.295, 0.345] | 1.02 × 10 <sup>-5</sup> (5.53 × 10 <sup>-6</sup> ) | [5.13 × 10 <sup>-6</sup> , 2.50 × 10 <sup>-5</sup> ] |
| Stab. + length | 1 | N                              | 0.690 (0.0253) | [0.639, 0.738] | 0.118 (0.163)                    | [-0.227, 0.406] | 1.39 × 10 <sup>-5</sup> (1.18 × 10 <sup>-5</sup> ) | [5.19 × 10 <sup>-6</sup> , 4.30 × 10 <sup>-5</sup> ] |
| Combinatorics  | 2 | N                              | 0.495 (0.0364) | [0.421, 0.563] | 0.000317 (0.158)                 | [-0.300, 0.315] | 0.00107 (0.00115)                                  | [7.79 × 10 <sup>-5</sup> , 0.00406]                  |
| Comb. + length | 2 | N                              | 0.504 (0.0384) | [0.426, 0.576] | 0.0399 (0.162)                   | [-0.271, 0.359] | 0.00205 (0.00215)                                  | [0.000184, 0.00781]                                  |
| Stability      | 2 | N                              | 0.600 (0.0363) | [0.525, 0.667] | 0.0554 (0.160)                   | [-0.256, 0.365] | 0.000192 (0.000305)                                | [8.58 × 10 <sup>-6</sup> , 0.000999]                 |
| Stab. + length | 2 | N                              | 0.602 (0.0367) | [0.527, 0.670] | 0.0886 (0.162)                   | [-0.230, 0.400] | 0.000447 (0.000623)                                | [2.78 × 10 <sup>-5</sup> , 0.00207]                  |
| Combinatorics  | 3 | N                              | 0.559 (0.0389) | [0.478, 0.630] | 0.000282 (0.158)                 | [-0.292, 0.320] | 0.000257 (0.000405)                                | [1.61 × 10 <sup>-5</sup> , 0.00132]                  |
| Comb. + length | 3 | N                              | 0.569 (0.0414) | [0.484, 0.646] | 0.0278 (0.162)                   | [-0.273, 0.352] | 0.000391 (0.000606)                                | [1.31 × 10 <sup>-5</sup> , 0.00215]                  |
| Stability      | 3 | N                              | 0.655 (0.0366) | [0.578, 0.721] | 0.0158 (0.159)                   | [-0.279, 0.335] | 2.85 × 10 <sup>-5</sup> (3.87 × 10 <sup>-5</sup> ) | [5.96 × 10 <sup>-6</sup> , 0.000105]                 |
| Stab. + length | 3 | N                              | 0.658 (0.0371) | [0.580, 0.725] | 0.0428 (0.162)                   | [-0.262, 0.366] | 4.07 × 10 <sup>-5</sup> (9.42 × 10 <sup>-5</sup> ) | [5.39 × 10 <sup>-6</sup> , 0.000263]                 |
| Combinatorics  | 4 | N                              | 0.543 (0.0397) | [0.461, 0.616] | 0.000473 (0.158)                 | [-0.292, 0.320] | 0.000412 (0.000595)                                | [2.19 × 10 <sup>-5</sup> , 0.00202]                  |
| Comb. + length | 4 | N                              | 0.563 (0.0437) | [0.474, 0.645] | 0.0242 (0.161)                   | [-0.275, 0.349] | 0.000441 (0.000764)                                | [8.55 × 10 <sup>-6</sup> , 0.00249]                  |
| Stability      | 4 | N                              | 0.617 (0.0397) | [0.534, 0.689] | 0.0454 (0.161)                   | [-0.263, 0.362] | 0.000134 (0.000268)                                | [7.97 × 10 <sup>-6</sup> , 0.000776]                 |
| Stab. + length | 4 | N                              | 0.623 (0.0419) | [0.536, 0.700] | 0.0810 (0.160)                   | [-0.230, 0.392] | 0.000210 (0.000450)                                | [1.22 × 10 <sup>-5</sup> , 0.00122]                  |
| Combinatorics  | 1 | Y                              | 0.376 (0.0192) | [0.339, 0.414] | 0.000210 (0.162)                 | [-0.342, 0.281] | 0.00204 (0.00152)                                  | [0.000229, 0.00601]                                  |
| Comb. + length | 1 | Y                              | 0.378 (0.0190) | [0.341, 0.415] | 0.0801 (0.165)                   | [-0.272, 0.368] | 0.0219 (0.00812)                                   | [0.00972, 0.0409]                                    |
| Stability      | 1 | Y                              | 0.675 (0.0253) | [0.624, 0.723] | 0.0529 (0.170)                   | [-0.306, 0.352] | 1.37 × 10 <sup>-5</sup> (9.96 × 10 <sup>-6</sup> ) | [5.25 × 10 <sup>-6</sup> , 3.64 × 10 <sup>-5</sup> ] |
| Stab. + length | 1 | Y                              | 0.679 (0.0250) | [0.629, 0.727] | 0.122 (0.167)                    | [-0.237, 0.416] | 3.29 × 10 <sup>-5</sup> (2.73 × 10 <sup>-5</sup> ) | [7.40 × 10 <sup>-6</sup> , 8.98 × 10 <sup>-5</sup> ] |
| Combinatorics  | 2 | Y                              | 0.466 (0.0330) | [0.400, 0.529] | 0.000394 (0.162)                 | [-0.315, 0.318] | 0.00186 (0.00157)                                  | [0.000232, 0.00602]                                  |
| Comb. + length | 2 | Y                              | 0.473 (0.0326) | [0.408, 0.535] | 0.0502 (0.167)                   | [-0.276, 0.374] | 0.00495 (0.00367)                                  | [0.000926, 0.0146]                                   |
| Stability      | 2 | Y                              | 0.602 (0.0325) | [0.536, 0.663] | 0.0606 (0.163)                   | [-0.258, 0.377] | 0.000235 (0.000289)                                | [2.69 × 10 <sup>-5</sup> , 0.000991]                 |
| Stab. + length | 2 | Y                              | 0.604 (0.0324) | [0.538, 0.665] | 0.103 (0.166)                    | [-0.223, 0.421] | 0.000609 (0.000701)                                | [5.19 × 10 <sup>-5</sup> , 0.00251]                  |
| Combinatorics  | 3 | Y                              | 0.631 (0.0336) | [0.563, 0.694] | -5.16 × 10 <sup>-5</sup> (0.162) | [-0.306, 0.325] | 4.44 × 10 <sup>-5</sup> (6.24 × 10 <sup>-5</sup> ) | [6.14 × 10 <sup>-6</sup> , 0.000210]                 |
| Comb. + length | 3 | Y                              | 0.643 (0.0319) | [0.578, 0.703] | 0.0409 (0.167)                   | [-0.276, 0.373] | 9.01 × 10 <sup>-5</sup> (0.000107)                 | [1.03 × 10 <sup>-5</sup> , 0.000359]                 |
| Stability      | 3 | Y                              | 0.731 (0.300)  | [0.669, 0.786] | 0.0197 (0.167)                   | [-0.297, 0.350] | 1.09 × 10 <sup>-5</sup> (6.19 × 10 <sup>-6</sup> ) | [5.15 × 10 <sup>-6</sup> , 2.68 × 10 <sup>-5</sup> ] |
| Stab. + length | 3 | Y                              | 0.734 (0.0290) | [0.674, 0.788] | 0.0581 (0.171)                   | [-0.268, 0.397] | 1.28 × 10 <sup>-5</sup> (1.15 × 10 <sup>-5</sup> ) | [5.19 × 10 <sup>-6</sup> , 3.61 × 10 <sup>-5</sup> ] |
| Combinatorics  | 4 | Y                              | 0.624 (0.0355) | [0.551, 0.690] | -7.38 × 10 <sup>-5</sup> (0.163) | [-0.309, 0.323] | 5.15 × 10 <sup>-5</sup> (7.59 × 10 <sup>-5</sup> ) | [6.07 × 10 <sup>-6</sup> , 0.000238]                 |
| Comb. + length | 4 | Y                              | 0.666 (0.0305) | [0.603, 0.722] | 0.0367 (0.166)                   | [-0.277, 0.366] | 4.46 × 10 <sup>-5</sup> (5.56 × 10 <sup>-5</sup> ) | [5.36 × 10 <sup>-6</sup> , 0.000198]                 |
| Stability      | 4 | Y                              | 0.692 (0.0389) | [0.609, 0.761] | 0.0237 (0.165)                   | [-0.290, 0.353] | 3.83 × 10 <sup>-5</sup> (5.52 × 10 <sup>-5</sup> ) | [5.89 × 10 <sup>-6</sup> , 0.000154]                 |
| Stab. + length | 4 | Y                              | 0.715 (0.0371) | [0.636, 0.780] | 0.0677 (0.166)                   | [-0.250, 0.396] | 2.87 × 10 <sup>-5</sup> (4.11 × 10 <sup>-5</sup> ) | [6.57 × 10 <sup>-6</sup> , 0.000122]                 |

<sup>†</sup> Yes (Y)/No (N) indicates exclusion/inclusion of sequences ‘ACACACACAC’ and ‘CACACACACACA’, respectively.



**Supplementary Table 3:** Statistics of optimised parameters for various applications of the model on experimental data.

| Model          | n | Outliers excluded <sup>†</sup> | $\kappa$ ( $\times 10^6$ s <sup>-1</sup> ) |              | $\alpha$            |                | $\gamma$                 |              |
|----------------|---|--------------------------------|--------------------------------------------|--------------|---------------------|----------------|--------------------------|--------------|
|                |   |                                | mean (std-dev)                             | 95% CI       | mean (std-dev)      | 95% CI         | mean (std-dev)           | 95% CI       |
| Combinatorics  | 1 | N                              | 6.12 (0.103)                               | [5.92, 6.32] | -2 <sup>‡</sup> (-) | -              | $-\infty^{\ddagger}$ (-) | -            |
| Comb. + length | 1 | N                              | 5.12 (1.29)                                | [3.06, 8.07] | -1.92 (0.0997)      | [-2.11, -1.72] | $-\infty^{\ddagger}$ (-) | -            |
| Stability      | 1 | N                              | 28.4 (5.35)                                | [20.6, 41.3] | -2 <sup>‡</sup> (-) | -              | 6.56 (0.320)             | [5.96, 7.22] |
| Stab. + length | 1 | N                              | 33.2 (9.18)                                | [18.8, 54.4] | -2.06 (0.105)       | [-2.26, -1.85] | 6.55 (0.325)             | [5.95, 7.22] |
| Combinatorics  | 2 | N                              | 10.3 (0.178)                               | [10.0, 10.7] | -2 <sup>‡</sup> (-) | -              | $-\infty^{\ddagger}$ (-) | -            |
| Comb. + length | 2 | N                              | 6.63 (1.49)                                | [4.19, 10.0] | -1.80 (0.0936)      | [-1.99, -1.62] | $-\infty^{\ddagger}$ (-) | -            |
| Stability      | 2 | N                              | 26.2 (5.38)                                | [13.0, 35.0] | -2 <sup>‡</sup> (-) | -              | 7.50 (0.753)             | [5.15, 8.29] |
| Stab. + length | 2 | N                              | 25.1 (11.2)                                | [7.68, 50.2] | -1.96 (0.117)       | [-2.18, -1.73] | 7.40 (0.867)             | [5.08, 8.32] |
| Combinatorics  | 3 | N                              | 13.6 (0.243)                               | [13.1, 14.1] | -2 <sup>‡</sup> (-) | -              | $-\infty^{\ddagger}$ (-) | -            |
| Comb. + length | 3 | N                              | 8.01 (1.60)                                | [5.34, 11.6] | -1.76 (0.0876)      | [-1.93, -1.59] | $-\infty^{\ddagger}$ (-) | -            |
| Stability      | 3 | N                              | 19.4 (0.653)                               | [18.1, 20.7] | -2 <sup>‡</sup> (-) | -              | 8.17 (0.143)             | [7.87, 8.44] |
| Stab. + length | 3 | N                              | 16.3 (3.49)                                | [10.5, 24.1] | -1.92 (0.0895)      | [-2.09, -1.74] | 8.17 (0.146)             | [7.86, 8.43] |
| Combinatorics  | 4 | N                              | 14.7 (0.271)                               | [14.2, 15.2] | -2 <sup>‡</sup> (-) | -              | $-\infty^{\ddagger}$ (-) | -            |
| Comb. + length | 4 | N                              | 6.73 (1.19)                                | [4.70, 9.34] | -1.63 (0.0821)      | [-1.79, -1.47] | $-\infty^{\ddagger}$ (-) | -            |
| Stability      | 4 | N                              | 46.4 (5.33)                                | [36.6, 56.7] | -2 <sup>‡</sup> (-) | -              | 13.2 (0.499)             | [12.7, 13.6] |
| Stab. + length | 4 | N                              | 27.6 (6.77)                                | [16.1, 42.0] | -1.74 (0.0881)      | [-1.91, -1.56] | 13.2 (1.10)              | [12.7, 13.8] |
| Combinatorics  | 1 | Y                              | 5.99 (0.104)                               | [5.79, 6.19] | -2 <sup>‡</sup> (-) | -              | $-\infty^{\ddagger}$ (-) | -            |
| Comb. + length | 1 | Y                              | 5.57 (1.45)                                | [3.25, 8.90] | -1.96 (0.103)       | [-2.16, -1.76] | $-\infty^{\ddagger}$ (-) | -            |
| Stability      | 1 | Y                              | 23.0 (3.41)                                | [17.8, 31.1] | -2 <sup>‡</sup> (-) | -              | 6.18 (0.283)             | [5.65, 6.77] |
| Stab. + length | 1 | Y                              | 30.7 (9.07)                                | [16.8, 51.9] | -2.11 (0.106)       | [-2.31, -1.90] | 6.16 (0.282)             | [5.65, 6.75] |
| Combinatorics  | 2 | Y                              | 10.6 (0.186)                               | [10.3, 11.0] | -2 <sup>‡</sup> (-) | -              | $-\infty^{\ddagger}$ (-) | -            |
| Comb. + length | 2 | Y                              | 7.79 (1.79)                                | [4.85, 11.8] | -1.86 (0.0948)      | [-2.04, -1.67] | $-\infty^{\ddagger}$ (-) | -            |
| Stability      | 2 | Y                              | 20.4 (2.92)                                | [15.5, 26.7] | -2 <sup>‡</sup> (-) | -              | 6.76 (0.449)             | [5.85, 7.57] |
| Stab. + length | 2 | Y                              | 19.6 (6.09)                                | [5.83, 7.58] | -1.97 (0.0988)      | [-2.16, -1.78] | 6.75 (0.456)             | [5.83, 7.58] |
| Combinatorics  | 3 | Y                              | 15.2 (0.263)                               | [14.7, 15.7] | -2 <sup>‡</sup> (-) | -              | $-\infty^{\ddagger}$ (-) | -            |
| Comb. + length | 3 | Y                              | 9.55 (1.89)                                | [6.36, 13.8] | -1.79 (0.0852)      | [-1.96, -1.62] | $-\infty^{\ddagger}$ (-) | -            |
| Stability      | 3 | Y                              | 20.1 (0.795)                               | [18.6, 21.8] | -2 <sup>‡</sup> (-) | -              | 7.75 (0.211)             | [7.32, 8.15] |
| Stab. + length | 3 | Y                              | 16.9 (3.61)                                | [10.9, 24.9] | -1.91 (0.0872)      | [-2.08, -1.74] | 7.74 (0.217)             | [7.29, 8.15] |
| Combinatorics  | 4 | Y                              | 17.4 (0.303)                               | [16.8, 18.0] | -2 <sup>‡</sup> (-) | -              | $-\infty^{\ddagger}$ (-) | -            |
| Comb. + length | 4 | Y                              | 6.92 (1.18)                                | [4.88, 9.51] | -1.57 (0.0767)      | [-1.72, -1.42] | $-\infty^{\ddagger}$ (-) | -            |
| Stability      | 4 | Y                              | 22.2 (2.72)                                | [18.4, 29.3] | -2 <sup>‡</sup> (-) | -              | 9.96 (0.772)             | [8.32, 11.4] |
| Stab. + length | 4 | Y                              | 10.4 (2.62)                                | [6.15, 16.2] | -1.62 (0.0826)      | [-1.78, -1.46] | 9.95 (1.35)              | [7.28, 12.0] |

<sup>†</sup> Yes (Y)/No (N) indicates exclusion/inclusion of sequences ‘ACACACACAC’ and ‘CACACACACACA’, respectively.

<sup>‡</sup> These coefficients are fixed and are not allowed to freely vary. In the case of  $\gamma$ , the value should be considered in the appropriate limit such that all complementary binding states possess a probability of hybridisation of 1 and all mis-matched sites possess a probability of 0.

**Supplementary Table 4:** Point estimates for  $\rho$ ,  $R^2$ , and model parameters using mean experimental rates as point estimates.

| Model          | n | Outliers excluded <sup>†</sup> | $\rho$ | $R^2$   | $\kappa$ ( $\times 10^6$ s <sup>-1</sup> ) | $\alpha$        | $\gamma$               |
|----------------|---|--------------------------------|--------|---------|--------------------------------------------|-----------------|------------------------|
| Combinatorics  | 1 | N                              | 0.381  | 0.122   | 6.12                                       | -2 <sup>‡</sup> | $-\infty$ <sup>‡</sup> |
| Comb. + length | 1 | N                              | 0.383  | 0.124   | 4.97                                       | -1.92           | $-\infty$ <sup>‡</sup> |
| Stability      | 1 | N                              | 0.712  | 0.502   | 27.5                                       | -2 <sup>‡</sup> | 6.55                   |
| Stab. + length | 1 | N                              | 0.712  | 0.503   | 31.5                                       | -2.06           | 6.54                   |
| Combinatorics  | 2 | N                              | 0.514  | 0.249   | 10.3                                       | -2 <sup>‡</sup> | $-\infty$ <sup>‡</sup> |
| Comb. + length | 2 | N                              | 0.521  | 0.259   | 6.46                                       | -1.80           | $-\infty$ <sup>‡</sup> |
| Stability      | 2 | N                              | 0.622  | 0.340   | 26.9                                       | -2 <sup>‡</sup> | 7.70                   |
| Stab. + length | 2 | N                              | 0.622  | 0.340   | 25.0                                       | -1.97           | 7.68                   |
| Combinatorics  | 3 | N                              | 0.580  | 0.163   | 13.6                                       | -2 <sup>‡</sup> | $-\infty$ <sup>‡</sup> |
| Comb. + length | 3 | N                              | 0.589  | 0.180   | 7.85                                       | -1.76           | $-\infty$ <sup>‡</sup> |
| Stability      | 3 | N                              | 0.679  | 0.309   | 19.4                                       | -2 <sup>‡</sup> | 8.18                   |
| Stab. + length | 3 | N                              | 0.681  | 0.312   | 15.9                                       | -1.91           | 8.18                   |
| Combinatorics  | 4 | N                              | 0.564  | -0.0878 | 14.7                                       | -2 <sup>‡</sup> | $-\infty$ <sup>‡</sup> |
| Comb. + length | 4 | N                              | 0.583  | -0.0397 | 6.63                                       | -1.63           | $-\infty$ <sup>‡</sup> |
| Stability      | 4 | N                              | 0.638  | -0.153  | 46.3                                       | -2 <sup>‡</sup> | 13.2                   |
| Stab. + length | 4 | N                              | 0.644  | -0.130  | 27.3                                       | -1.74           | 13.3                   |
| Combinatorics  | 1 | Y                              | 0.389  | 0.127   | 59.9                                       | -2 <sup>‡</sup> | $-\infty$ <sup>‡</sup> |
| Comb. + length | 1 | Y                              | 0.390  | 0.128   | 5.40                                       | -1.96           | $-\infty$ <sup>‡</sup> |
| Stability      | 1 | Y                              | 0.699  | 0.478   | 22.4                                       | -2 <sup>‡</sup> | 6.16                   |
| Stab. + length | 1 | Y                              | 0.701  | 0.481   | 29.2                                       | -2.11           | 6.15                   |
| Combinatorics  | 2 | Y                              | 0.484  | 0.234   | 10.6                                       | -2 <sup>‡</sup> | $-\infty$ <sup>‡</sup> |
| Comb. + length | 2 | Y                              | 0.489  | 0.239   | 7.60                                       | -1.86           | $-\infty$ <sup>‡</sup> |
| Stability      | 2 | Y                              | 0.623  | 0.384   | 20.1                                       | -2 <sup>‡</sup> | 6.78                   |
| Stab. + length | 2 | Y                              | 0.622  | 0.384   | 18.6                                       | -1.97           | 6.76                   |
| Combinatorics  | 3 | Y                              | 0.655  | 0.429   | 15.2                                       | -2 <sup>‡</sup> | $-\infty$ <sup>‡</sup> |
| Comb. + length | 3 | Y                              | 0.665  | 0.443   | 9.36                                       | -1.79           | $-\infty$ <sup>‡</sup> |
| Stability      | 3 | Y                              | 0.758  | 0.574   | 20.1                                       | -2 <sup>‡</sup> | 7.76                   |
| Stab. + length | 3 | Y                              | 0.759  | 0.576   | 16.5                                       | -1.91           | 7.75                   |
| Combinatorics  | 4 | Y                              | 0.647  | 0.400   | 17.4                                       | -2 <sup>‡</sup> | $-\infty$ <sup>‡</sup> |
| Comb. + length | 4 | Y                              | 0.689  | 0.470   | 68.3                                       | -1.57           | $-\infty$ <sup>‡</sup> |
| Stability      | 4 | Y                              | 0.717  | 0.458   | 21.6                                       | -2 <sup>‡</sup> | 9.98                   |
| Stab. + length | 4 | Y                              | 0.738  | 0.507   | 9.95                                       | -1.64           | 9.99                   |

<sup>†</sup> Yes (Y)/No (N) indicates exclusion/inclusion of sequences 'ACACACACAC' and 'CACACACACACA', respectively.

<sup>‡</sup> These coefficients are fixed and are not allowed to freely vary. In the case of  $\gamma$ , the value should be considered in the appropriate limit such that all complementary binding states possess a probability of hybridisation of 1 and all mis-matched sites possess a probability of 0.
